# Supplementary material
Source: Springer Nature journal article supplement (https://www.springermedizin.de/resource/supplementary/12879_2012_2294_MOESM2_ESM.pdf/9445490)
Supplement: MOESM2 [file 9445490]

Table 2: Bacterial isolates and susceptibility patterns among study population

| <b>Bacteria isolates</b>                | <b>N</b>  | <b>GEN</b> | <b>CRX</b> | <b>CHLO</b> | <b>CTR</b> | <b>CTX</b> | <b>AMP</b> | <b>TET</b> | <b>COT</b> | <b>PEN</b> | <b>FLX</b> | <b>ERY</b> |
|-----------------------------------------|-----------|------------|------------|-------------|------------|------------|------------|------------|------------|------------|------------|------------|
|                                         |           | n(%)       | n(%)       | n(%)        | n(%)       | n(%)       | n(%)       | n(%)       | n(%)       | n(%)       | n(%)       | n(%)       |
| <i>Salmonella spp</i>                   | <b>8</b>  | -          | -          | 5(62.5)     | 8(100.0)   | 8(100.0)   | 0(0.0)     | 0(0.0)     | 0(0.0)     | -          | -          | -          |
| <i>Klebsiella spp</i>                   | <b>12</b> | 4(33.3)    | 1(8.3)     | 5(41.7)     | 11(91.7)   | 11(91.7)   | 0(0.0)     | 1(8.3)     | 0(0.0)     | -          | -          | -          |
| <i>Escherichia coli</i>                 | <b>6</b>  | 4(66.7)    | 4(66.7)    | 2(33.3)     | 4(66.7)    | 4(66.7)    | 2(33.3)    | 1(16.7)    | 2(33.3)    | -          | -          | -          |
| <i>Acinetobacter spp</i>                | <b>2</b>  | 2(100.0)   | 0(0.0)     | 0(0.0)      | 2(100)     | 2(100.0)   | 0(0.0)     | 0(0.0)     | 0(0.0)     | -          | -          | -          |
| <i>Pseudomonas aeruginosa</i>           | <b>3</b>  | 1(33.3)    | -          | -           | 1(33.3)    | 1(33.3)    | -          | -          | -          | -          | -          | -          |
| <i>Coagulase negative Staphylococci</i> | <b>25</b> | 18(72.0)   | 14(56.0)   | -           | -          | -          | 1(4.0)     | 6(24.0)    | 5(20.0)    | 1(4.0)     | 10(40.0)   | 13(52.0)   |
| <i>Coagulase positive Staphylococci</i> | <b>28</b> | 12(42.9)   | 16(57.1)   | -           | -          | -          | 1(3.6)     | 2(25)      | 2(7.1)     | 1(3.6)     | 8(28.6)    | 10(35.7)   |

GEN –Gentamicin, CRX-Cefuroxime, CHLO-Chloramphenicol, CTR-Ceftriaxone, CTX- Cefotaxime, AMP-Ampicillin, TET- Tetracycline, COT-Cotrimoxazole, PEN- Penicillin, FLX-Flucloxacillin, ERY- Erythromycin, (-) – Not done, *Salmonella spp*= *Salmonella spp* and *Salmonella typhi*, *Klebsiella spp* = *Klebsiella spp* and *Klebsiella pneumoniae*
